# Supplementary material for: Geographical Relationships between Long-Tailed Goral (Naemorhedus caudatus) Populations Based on Gut Microbiome Analysis
Source: MDPI journal article supplement (doi:10.3390/microorganisms9092002), 2021-09-21
Supplement: s1 [file s1]

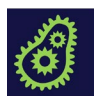

Supplementary materials

**Table S1.** The composition percentage of five phyla of gut microbiome for each region.

| Phylum           | JW    | OD    | SA    | SC    | TB    | WA    | WPC   |
|------------------|-------|-------|-------|-------|-------|-------|-------|
| Firmicutes       | 59.86 | 18.27 | 26.52 | 20.13 | 7.40  | 41.04 | 13.53 |
| Actinobacteriota | 23.99 | 12.10 | 18.80 | 28.82 | 45.53 | 17.47 | 29.86 |
| Bacteroidota     | 7.80  | 40.37 | 16.70 | 35.35 | 22.94 | 8.55  | 28.69 |
| Proteobacteria   | 0.00  | 23.29 | 31.88 | 12.75 | 13.15 | 25.78 | 25.27 |
| Euryarchaeota    | 8.35  | 0.69  | 2.17  | 0.63  | 5.29  | 0.29  | 0.25  |

Abbreviations: JW = Juwangsang National Park; OD = Odaesan National Park; SC = Samcheok Area; SA = Seoraksan National Park; TB = Taebaeksan National Park; WPC = Wangpicheon Conservation Area; WA = Woraksan National Park.

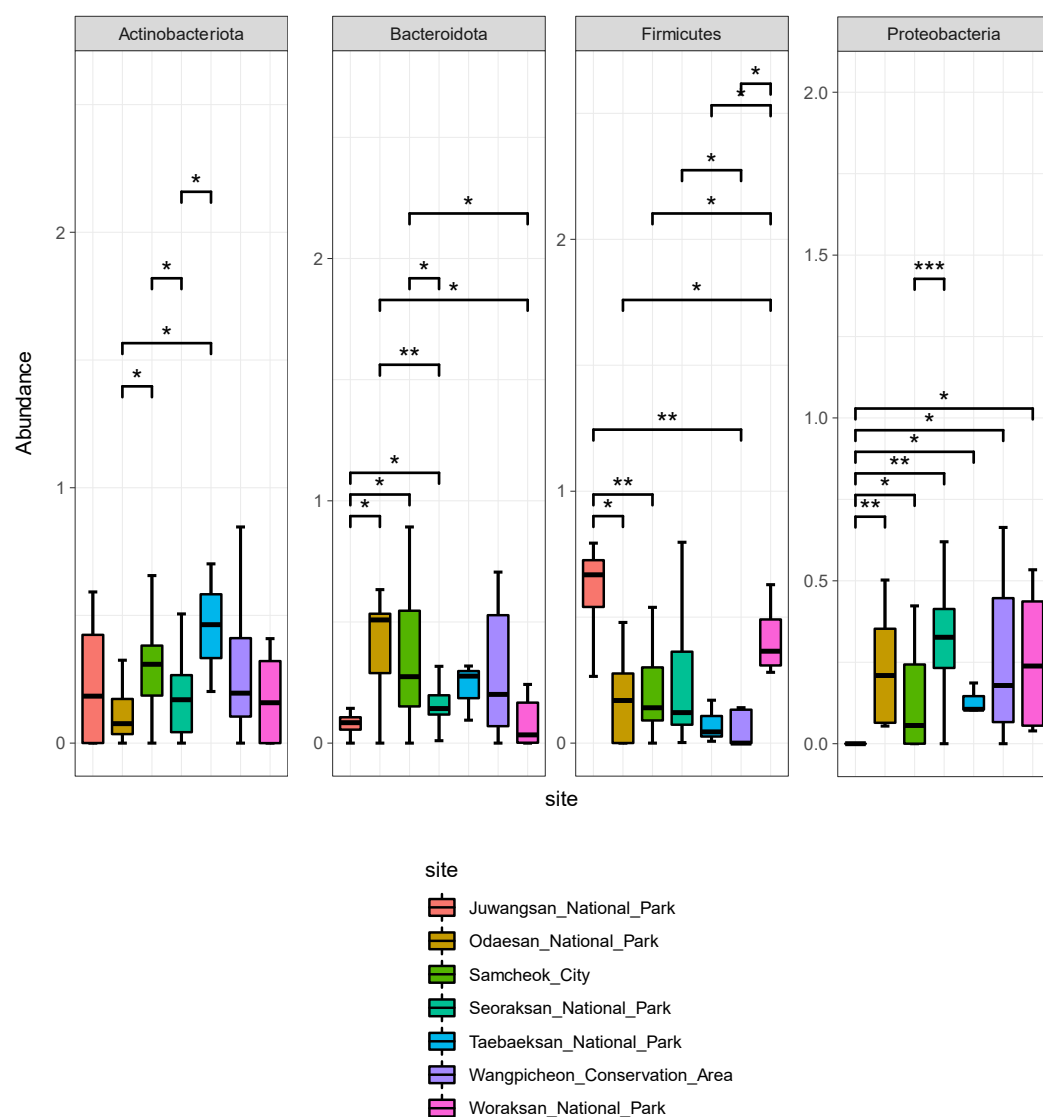

**Figure S1.** Statistical comparisons of abundances for phyla (Wilcoxon rank sum tests). \*  $P < 0.05$ , \*\*  $P < 0.01$ , \*\*\*  $P < 0.001$ .

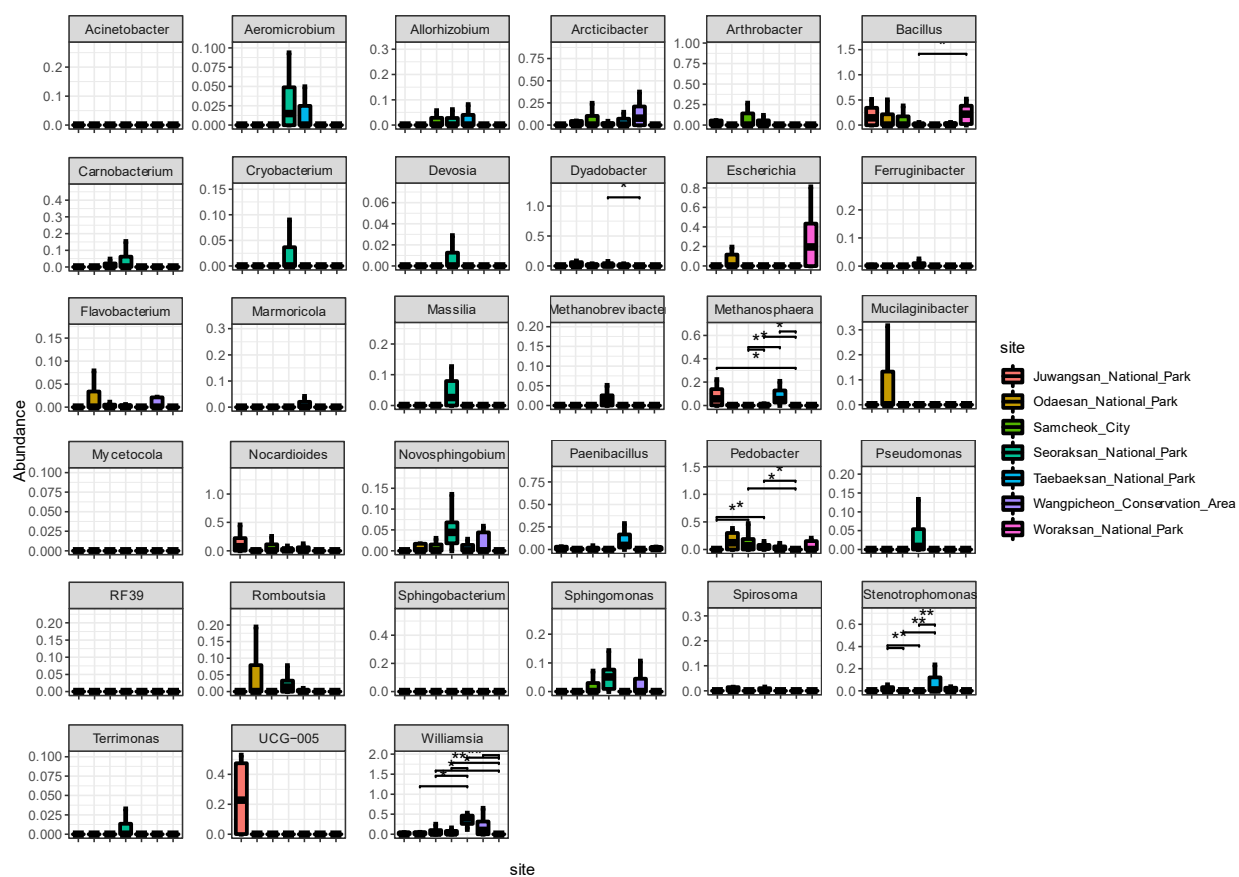

**Figure S2.** Statistical comparisons of abundances for genera (Wilcoxon rank sum tests). \*  $P < 0.05$ , \*\*  $P < 0.01$ .
